# Supplementary material for: First Field Observations of Drupella feeding on Millepora in Indo Pacific reefs
Source: Research Square preprint supplement (doi:10.21203/rs.3.rs-8716849/v1), 2026-02-09
Supplement: Supplementary file 2 [file d856e285b5f301b25d8fa5d6.docx]

First Field Observations of *Drupella* feeding on *Millepora* in Indo Pacific reefs

Discover Animals

Febrianne Sukiato1,2, Kok Lynn Chew3, Tanya Toofany4,5*

1Luminocean, Banda Neira, Maluku, Indonesia

2SeaChange Indonesia, Lombok, West Nusa Tenggara, Indonesia

3Coralku Solutions, Non-Profit Organization for Coral Reef Research and Restoration, Kuala Lumpur, Malaysia

4University of Bremen, Faculty of Biology and Chemistry, Bremen, Germany 28359

5Leibniz Centre for Tropical Marine Research (ZMT), Bremen, Germany 28359

*Corresponding author:

Tanya Toofany (tan_too@uni-bremen.de; tanya_1705@live.com)


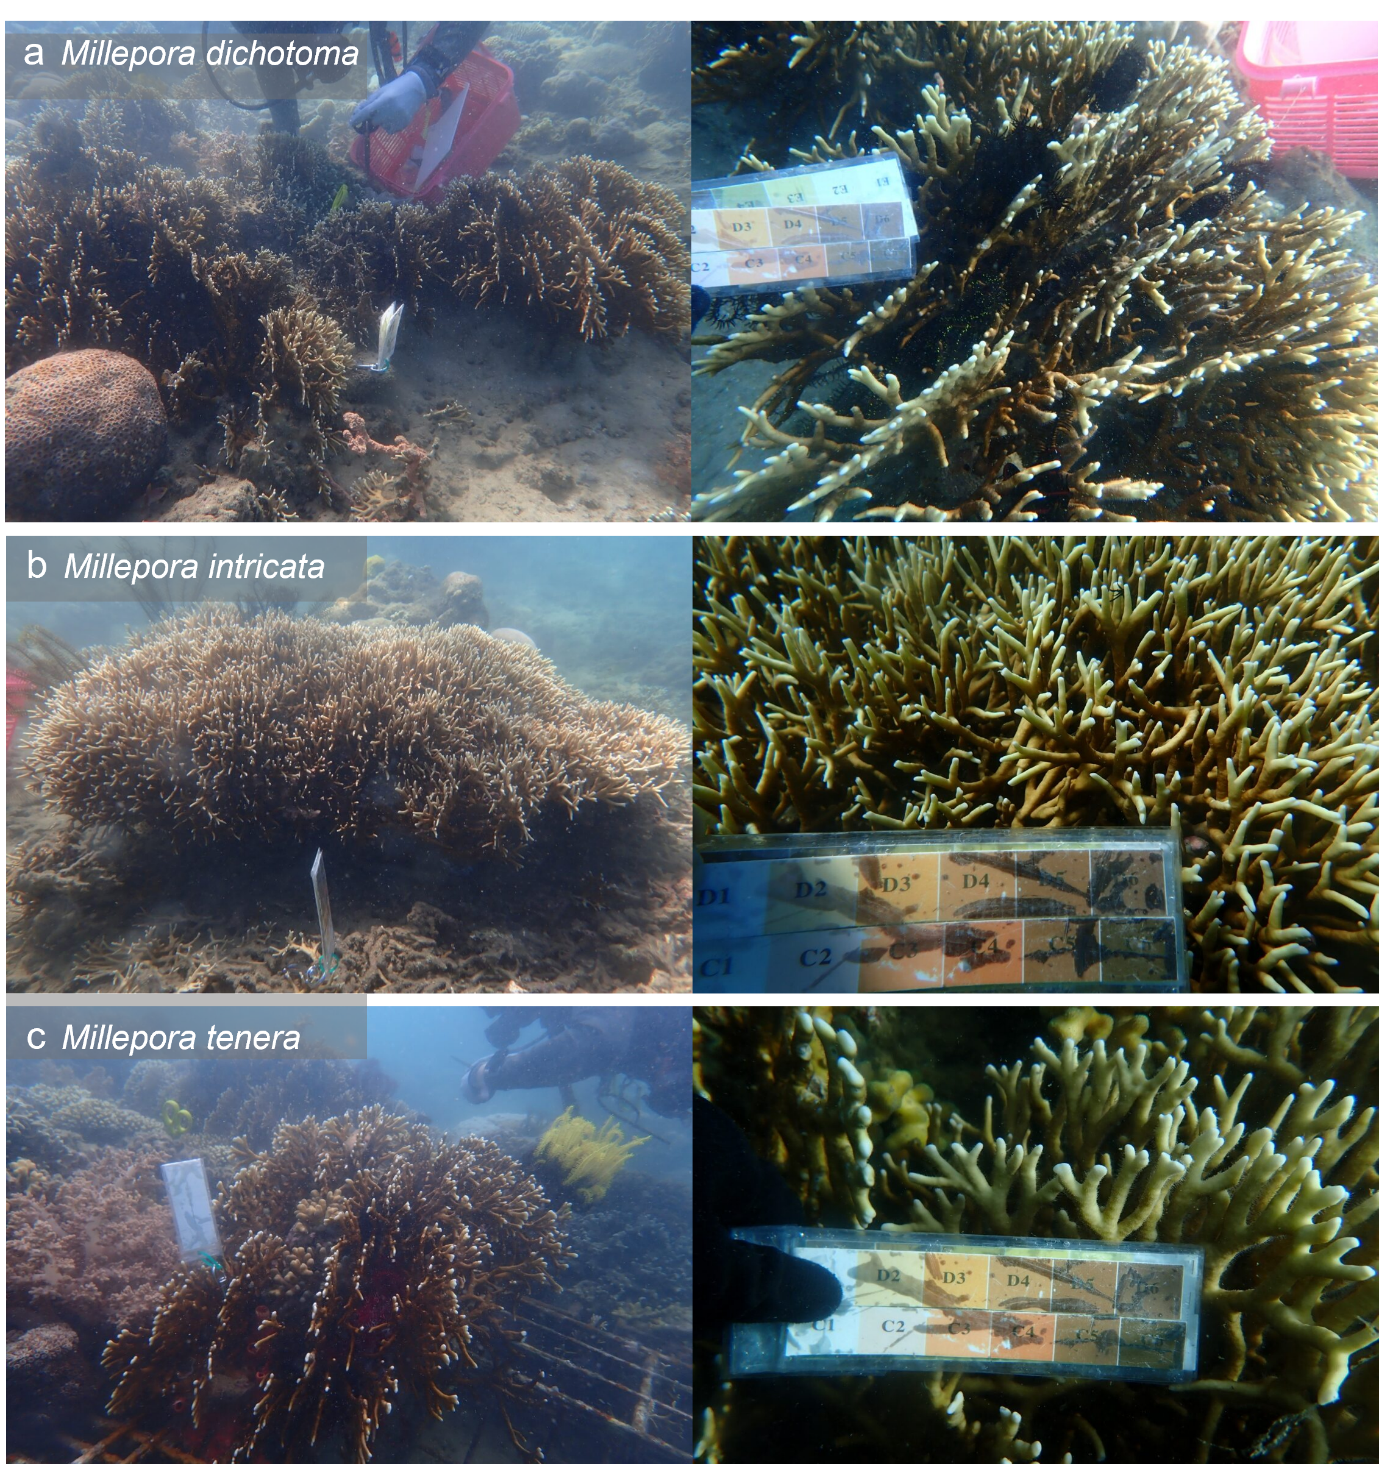


**Supp Fig. S1** (a) *M. dichotoma*; (b) *M. intricata*; (c) *M. tenera* colonies
